# Supplementary material for: Loading IR820 Using Multifunctional Dendrimers with Enhanced Stability and Specificity
Source: PubMed Central journal article supplement (PMC6161036; doi:10.3390/pharmaceutics10030077), 2018-06-28
Supplement: pharmaceutics-10-00077-s001.pdf [file pharmaceutics-10-00077-s001.pdf]

# Supplementary Materials for Loading IR820 using Multifunctional Dendrimers with Enhanced Stability and Specificity

Hui Liu \* and Jingjing Wang

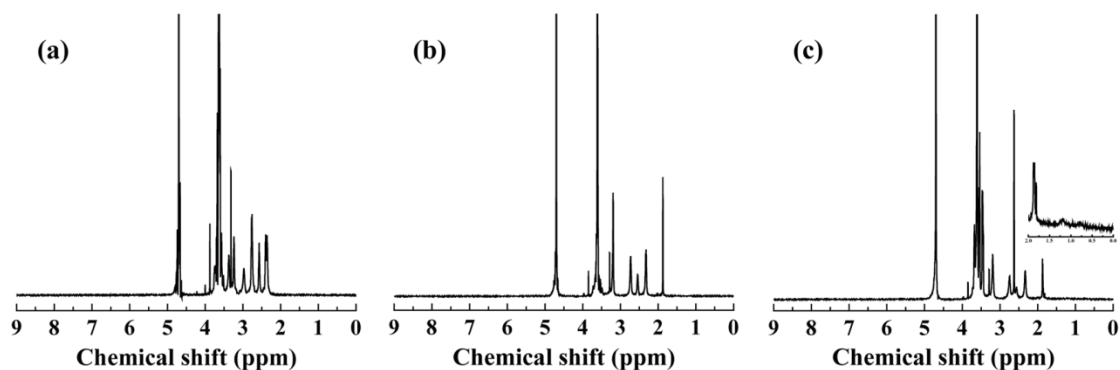

Figure S1. <sup>1</sup>H NMR spectra of G5.NH<sub>2</sub>-mPEG (a), Ac-P (b), and Ac-P/IR820 (c).

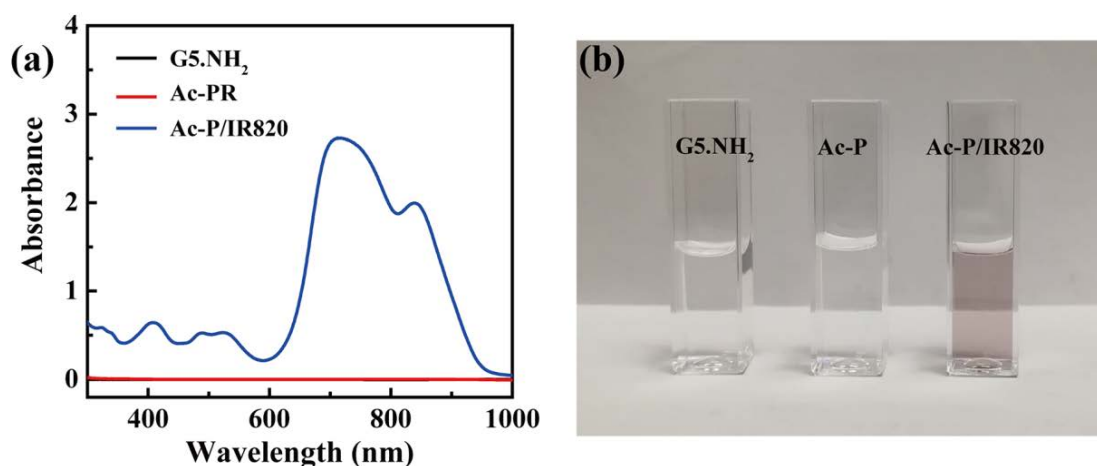

Figure S2. UV-vis spectra G5.NH<sub>2</sub>, Ac-P, and Ac-P/IR820 dendrimers (a) and their corresponding photos (b).

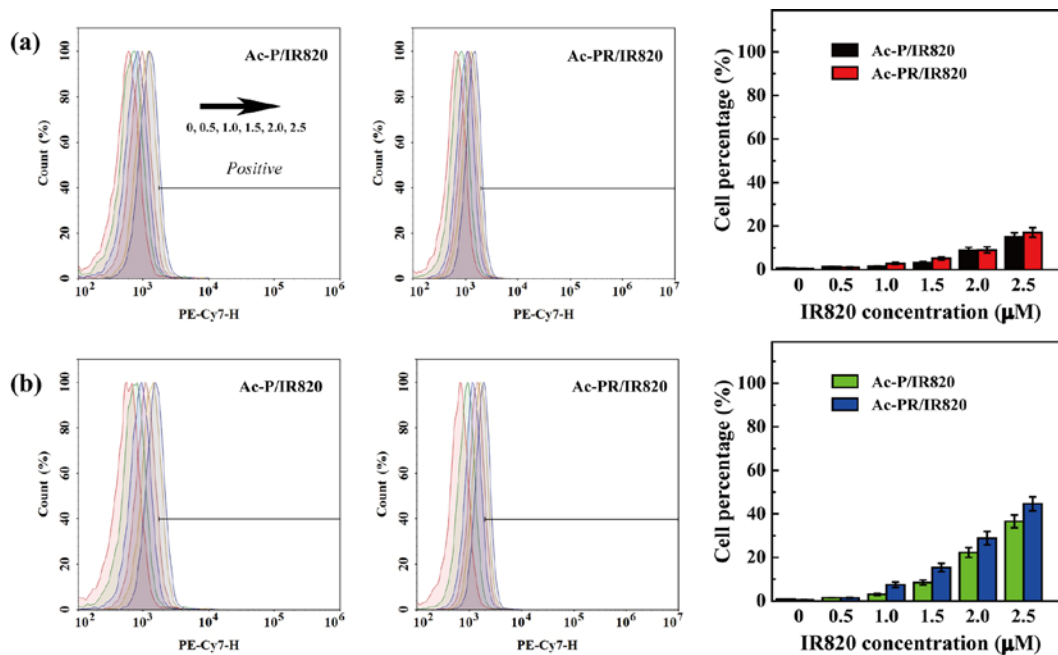

**Figure S3.** Flow cytometry analysis of L929 cells after co-incubation with Ac-P/IR820 and Ac-PR/IR820 dendrimers for 3 h (a) and 6 h (b).
